# Supplementary material for: Increased uterine androgen receptor protein abundance results in implantation and mitochondrial defects in pregnant rats with hyperandrogenism and insulin resistance
Source: PubMed Central journal article supplement (PMC8455403; doi:10.1007/s00109-021-02104-z), 2021-06-28

## Supporting Data

### Deciphering the role of uterine AR in PCOS during early pregnancy

Yuehui Zhang<sup>1,2</sup>, Min Hu<sup>2,3,4</sup>, Fan Yang<sup>1</sup>, Yizhuo Zhang<sup>1</sup>, Shuting Ma<sup>1</sup>, Dongqi Zhang<sup>1</sup>, Xu Wang<sup>1</sup>, Amanda Nancy Sferruzzi-Perri<sup>5</sup>, Xiaoke Wu<sup>1</sup>, Mats Brännström<sup>6</sup>, Linus R Shao<sup>2</sup>, and Håkan Billig<sup>2</sup>

<sup>1</sup> Department of Obstetrics and Gynecology, Key Laboratory and Unit of Infertility in Chinese Medicine, First Affiliated Hospital, Heilongjiang University of Chinese Medicine, 150040 Harbin, China

<sup>2</sup> Department of Physiology/Endocrinology, Institute of Neuroscience and Physiology, The Sahlgrenska Academy, University of Gothenburg, 40530 Gothenburg, Sweden

<sup>3</sup> Department of Traditional Chinese Medicine, The First Affiliated Hospital of Guangzhou Medical University, 510120 Guangzhou, China

<sup>4</sup> Institute of Integrated Traditional Chinese Medicine and Western Medicine, Guangzhou Medical University, 510120 Guangzhou, China

<sup>5</sup> Centre for Trophoblast Research, Department of Physiology, Development and Neuroscience, University of Cambridge, Cambridge, CB2 3EG, UK

<sup>6</sup> Department of Obstetrics and Gynecology, Sahlgrenska University Hospital, Sahlgrenska Academy, University of Gothenburg, 41345 Gothenburg, Sweden

**Key findings:** Hyperandrogenism and insulin resistance perturb the implantation process and mitochondrial dysfunction through the defective androgen receptor signaling in the rat gravid uterus

**Supporting data include two Supplemental Tables, and 7 Supplemental Figures**

## Supporting Data

**Supplemental Table 1.** Sequences of primer pairs used for qRT-PCR measurement.

| Gene          | Primer  | Product Size              |
|---------------|---------|---------------------------|
| <i>Lif</i>    | Forward | CGCCCAACATGACGGATTTTC     |
|               | Reverse | TTGTTGCACAGACGGCAAAG      |
| <i>Nr2f2</i>  | Forward | GTCGCCTTTATGGACCACAT      |
|               | Reverse | CGTGGGCTACATCAGACAGA      |
| <i>Pc6</i>    | Forward | GTGTGAGAATGGGTCGGAGA      |
|               | Reverse | TTTCTTTCCACTTTCGGCCG      |
| <i>Ptch</i>   | Forward | GAACAAGCAACTTCCCCAAA      |
|               | Reverse | AATGTCGATGGGCTTGTCTC      |
| <i>Spp1</i>   | Forward | CTGAAGCCTGACCCATCTCA      |
|               | Reverse | TCGTCGTCATCATCGTCCAT      |
| <i>Prl</i>    | Forward | CAAGAAGAAGGGGCAACCT       |
|               | Reverse | CTGGTGGTGACTIONTCCCTTC    |
| <i>Igfbp1</i> | Forward | TGTACTIONAACCTGCCGCAC     |
|               | Reverse | AGCAGCTGTTCCCTCTGTCAT     |
| <i>Pgr</i>    | Forward | GGTCTAAGTCTCTGCCAGGTTTCC  |
|               | Reverse | CAACTCCTTCATCCTCTGCTCATTC |
| <i>Hoxa10</i> | Forward | TCCGAAAACAGTAAAGCCTCTC    |
|               | Reverse | GCGTCTGGTGTCTTCGTGTAA     |
| <i>Hoxa11</i> | Forward | GACTCCCTACCTACCTTGGC      |
|               | Reverse | GCAACCACTGTACATGTCCGG     |
| <i>Il11</i>   | Forward | GACTCCCTACCTACCTTGGC      |
|               | Reverse | GCAACCACTGTACATGTCCGG     |
| <i>Hbegf</i>  | Forward | GCTCTTCCACCTGGCTCAAT      |
|               | Reverse | CACAACCCACCCTGGGATAC      |
| <i>Tfam</i>   | Forward | ACAAAGAAGCTGTGAGCAAGTA    |
|               | Reverse | GTGCTTTCTTTAGGCGTTTC      |
| <i>Pgc1a</i>  | Forward | GTGGATGAAGACGGATTGCC      |
|               | Reverse | GGTGTGGTTTGCATGGTTCT      |
| <i>Nrf1</i>   | Forward | GGAAACTCAGAGCCACATTAGA    |
|               | Reverse | GCGCAAACACCTTAAAGAC       |
| <i>Gapdh</i>  | Forward | TCTCTGCTCCTCCCTGTTCTA     |
|               | Reverse | GGTAACCAGGCGTCCGATAC      |
| <i>Actb</i>   | Forward | CGCGAGTACAACCTTCTTGC      |
|               | Reverse | CGTCATCCATGGCGAACTGG      |

*Lif*, leukemia inhibitory factor; *Nr2f2*, nuclear receptor subfamily 2 group F member 2; *Pc6*, protein convertase 5/6; *Ptch*, patched; *Spp1*, osteopontin/secreted phosphoprotein 1; *Prl*, prolactin; *Igfbp1*, insulin-like growth factor binding protein 1; *Pgr*, progesterone receptor; *Hoxa10*, homeobox A10; *Il11*, interleukin-11; *Hbegf*, heparin-binding EGF-like growth factor; *Tfam*, mitochondrial transcription factor a; *Pgc1a*, peroxisome proliferative activated receptor gamma coactivator 1 alpha; *Nrf1*, nuclear respiratory factor 1; *Gapdh*, glyceraldehyde-3-phosphate dehydrogenase; *Actb*, beta-actin.

## Supporting Data

**Supplemental Table 2.** Antibodies: species, clone/catalog number, method, dilution, and source.

| Antibody                 | Species | Clone / Cat. No.      | kDa                                      | Method    | Dilution        | Source                                         |
|--------------------------|---------|-----------------------|------------------------------------------|-----------|-----------------|------------------------------------------------|
| AR                       | Rabbit  | EPR1535(2)<br>/133273 | 98                                       | WB<br>IHC | 1:1000<br>1:200 | Abcam (Cambridge, UK)                          |
| pan-Cytokeratin          | Mouse   | C-11/P2871            | 45-59                                    | WB        | 1:1000          | Sigma-Aldrich (St. Louis, MO)                  |
| Vimentin                 | Rabbit  | D21H3/5741            | 57                                       | WB        | 1:1000          | Cell Signaling Technology (Danver, MA)         |
| $\alpha$ -SMA            | Mouse   | 1A4/A5228             | 42                                       | WB        | 1:1000          | Sigma-Aldrich                                  |
| p21 <sup>WAF1/CIP1</sup> | Mouse   | F-5/6246              | 21                                       | WB        | 1:200           | Santa Cruz Biotechnology (Heidelberg, Germany) |
| VDAC                     | Rabbit  | D73D12/4661           | 32                                       | WB        | 1:1000          | Cell Signaling Technology                      |
| PHB1                     | Rabbit  | 2426                  | 32                                       | WB        | 1:1000          | Cell Signaling Technology                      |
| Total OXPHOS             | Mouse   | 110413                | I 20<br>II 30<br>III 48<br>IV 40<br>V 55 | WB        | 1:500           | Abcam                                          |

AR, androgen receptor;  $\alpha$ -SMA,  $\alpha$ -smooth muscle actin; VDAC, voltage-dependent anion channel; PHB1, prohibitin 1; Total OXPHOS, total oxidative phosphorylation; WB, western blot; IHC, immunohistochemistry.

## Supporting Data

### Suppl Figure legend

**Suppl Figure 1. Characterization of the specificity of the AR antibody.** The signal intensity of cellular AR decreases with increasing antibody concentration. Using the uterus from rats on GD 4.5 for immunohistochemical staining, an antibody against AR was used to determine the proper concentration of antibody (1:200 dilution). Representative images of AR antibody staining at different dilutions are shown (1–5). The same concentration of rabbit IgG instead of the primary and secondary antibodies was used as the negative control (6). Lm, longitudinal myometrium; Cm, circular myometrium. Scale bars (100  $\mu\text{m}$ ) are indicated in the photomicrographs.

**Suppl Figure 2. Localization of AR protein in uteri collected from control pregnant rats at GD 7.5.** Hematoxylin and eosin (H&E) counterstaining and negative control serial sections are shown in the left and right panels. Due to continuing proliferation and differentiation of the stromal fibroblast cells into decidual cells, the decidual cells are larger in the PDZ and SDZ than those in DB area. Images for AR immunostaining (the middle panel) are representative of 8 tissue replicates. GD, gestational day; DB, decidual basalis; E, embryo; PDZ, primary decidual zone; SDZ, secondary decidual zone; Cm, circular myometrium; Lm, longitudinal myometrium; Le, luminal epithelial cells; Ge, glandular epithelial cells; Str, stromal cells. Scale bars (100  $\mu\text{m}$ ) are indicated in the photomicrographs.

**Suppl Figure 3. Localization of AR protein in uteri collected from control pregnant rats at GD 10.5.** H&E counterstaining is shown in the left panel. Images for AR immunostaining (the right panel) are representative of 8 tissue replicates. Ge, glandular epithelial cells; Lm, longitudinal myometrium; DB, decidual basalis; SDZ, secondary decidual zone. Scale bars (100  $\mu\text{m}$ ) are indicated in the photomicrographs.

**Suppl Figure 4. Localization of AR protein in uteri collected from control pregnant rats at GD 14.5.** H&E counterstaining and negative control serial sections are shown in the left and right panels, respectively. Images for AR immunostaining (the right panel) are representative of 8 tissue replicates. Ut, uterus; P, placental disc; F, fetus; MT, mesometrial triangle; MD, mesometrial decidual; BZ, basal zone; LZ, labyrinth zone; GC, glycogen cells; Sp, spongiotrophoblast cells; Cp, cytotrophoblast cells; Sy, syncytiotrophoblast cells; MV, maternal vessel; FV, fetal vessel. Scale bars (100  $\mu\text{m}$ ) are indicated in the photomicrographs.

**Suppl Figure 5. Treatment with flutamide only partially restores fertility in DHT+INS-exposed pregnant rats.** Histological analysis by H&E counterstaining showing that no fetuses were found in DHT+INS-exposed pregnant rats treated with flutamide. The yellow arrowheads indicate infiltrated immune cells in the endometrial gland. Images are representative of 3 tissue replicates. M, myometrium; En, endometrium; G, gland. Scale bars (100  $\mu\text{m}$ ) are indicated in the photomicrographs.

**Suppl Figure 6. Effects of DHT and INS on ovarian weight in pregnant rats from GD 4.5 to GD 14.5.** Comparison of ovarian weight in pregnant rats treated with and without DHT and/or INS ( $n = 8/\text{group}$ ). Data are presented as means  $\pm$  SEM. Statistical tests are described in the Materials and Methods, and differences between the groups are reported as \*  $P < 0.05$ .

**Suppl Figure 7. Effects of flutamide on ovarian morphology and corpus lutea number in control and DHT+INS-exposed pregnant rats at GD 14.5.** Histological analysis by H&E staining (A) and quantification of the total numbers of corpus lutea (B) in vehicle control and DHT+INS-exposed pregnant rats treated with flutamide ( $n = 7\text{--}10/\text{group}$ ). Scale bars (100  $\mu\text{m}$ ) are indicated in the photomicrographs.

**Suppl Fig. 1**

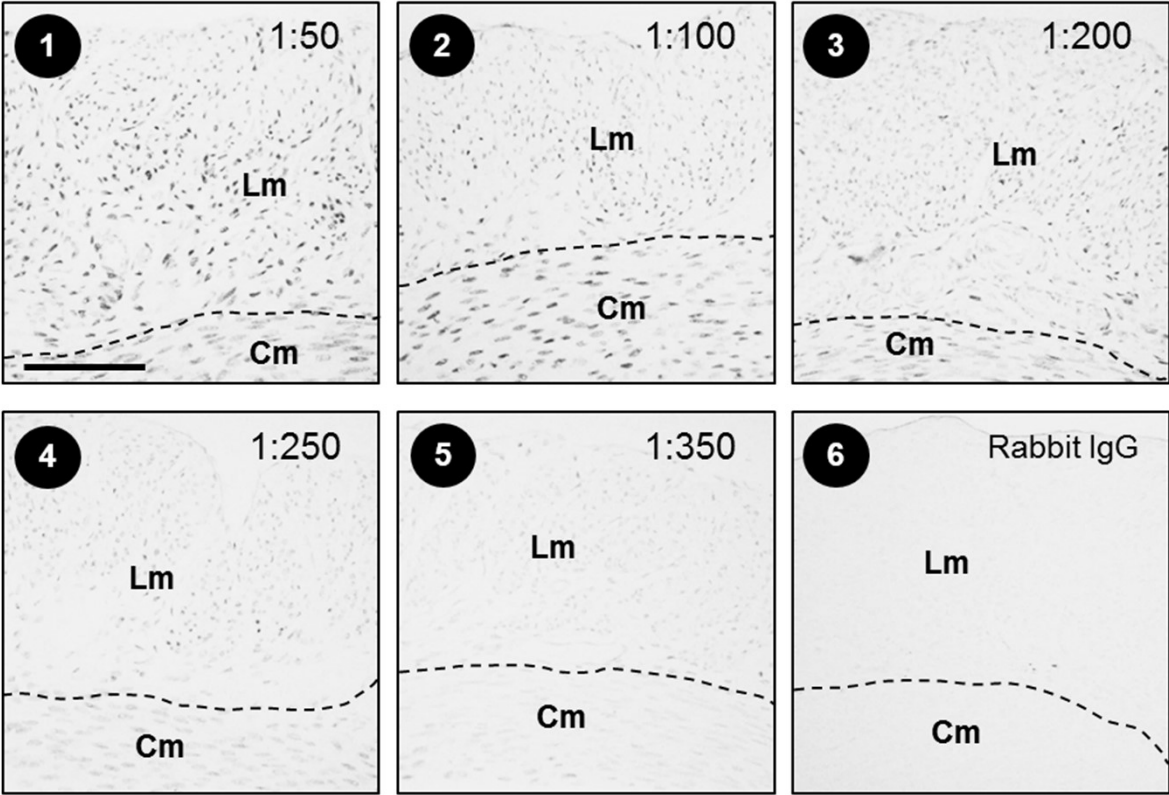

# Suppl Fig. 2

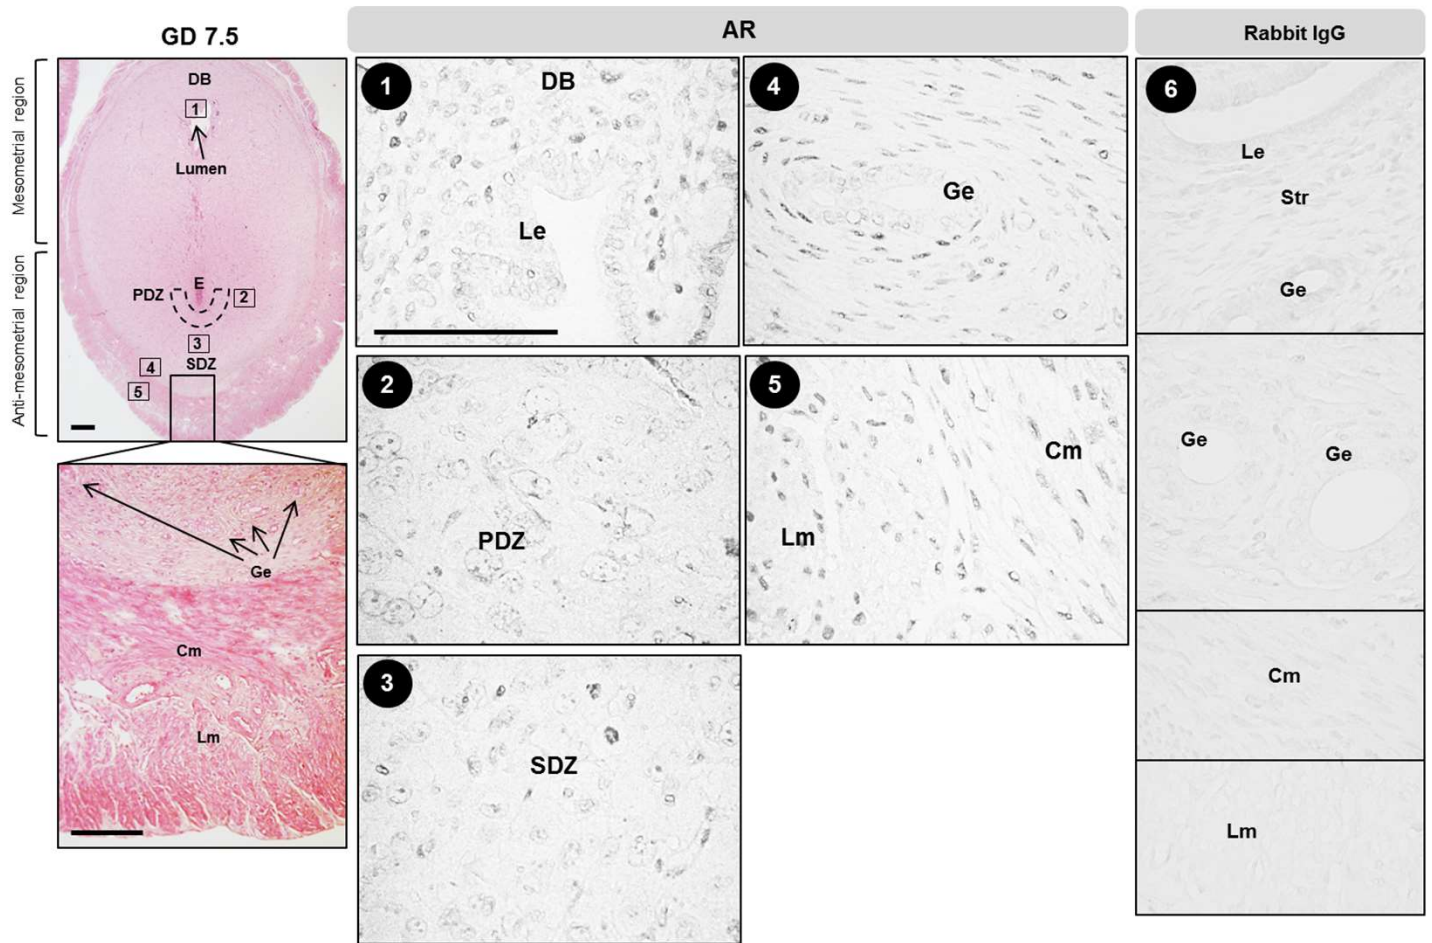

# Suppl Fig. 3

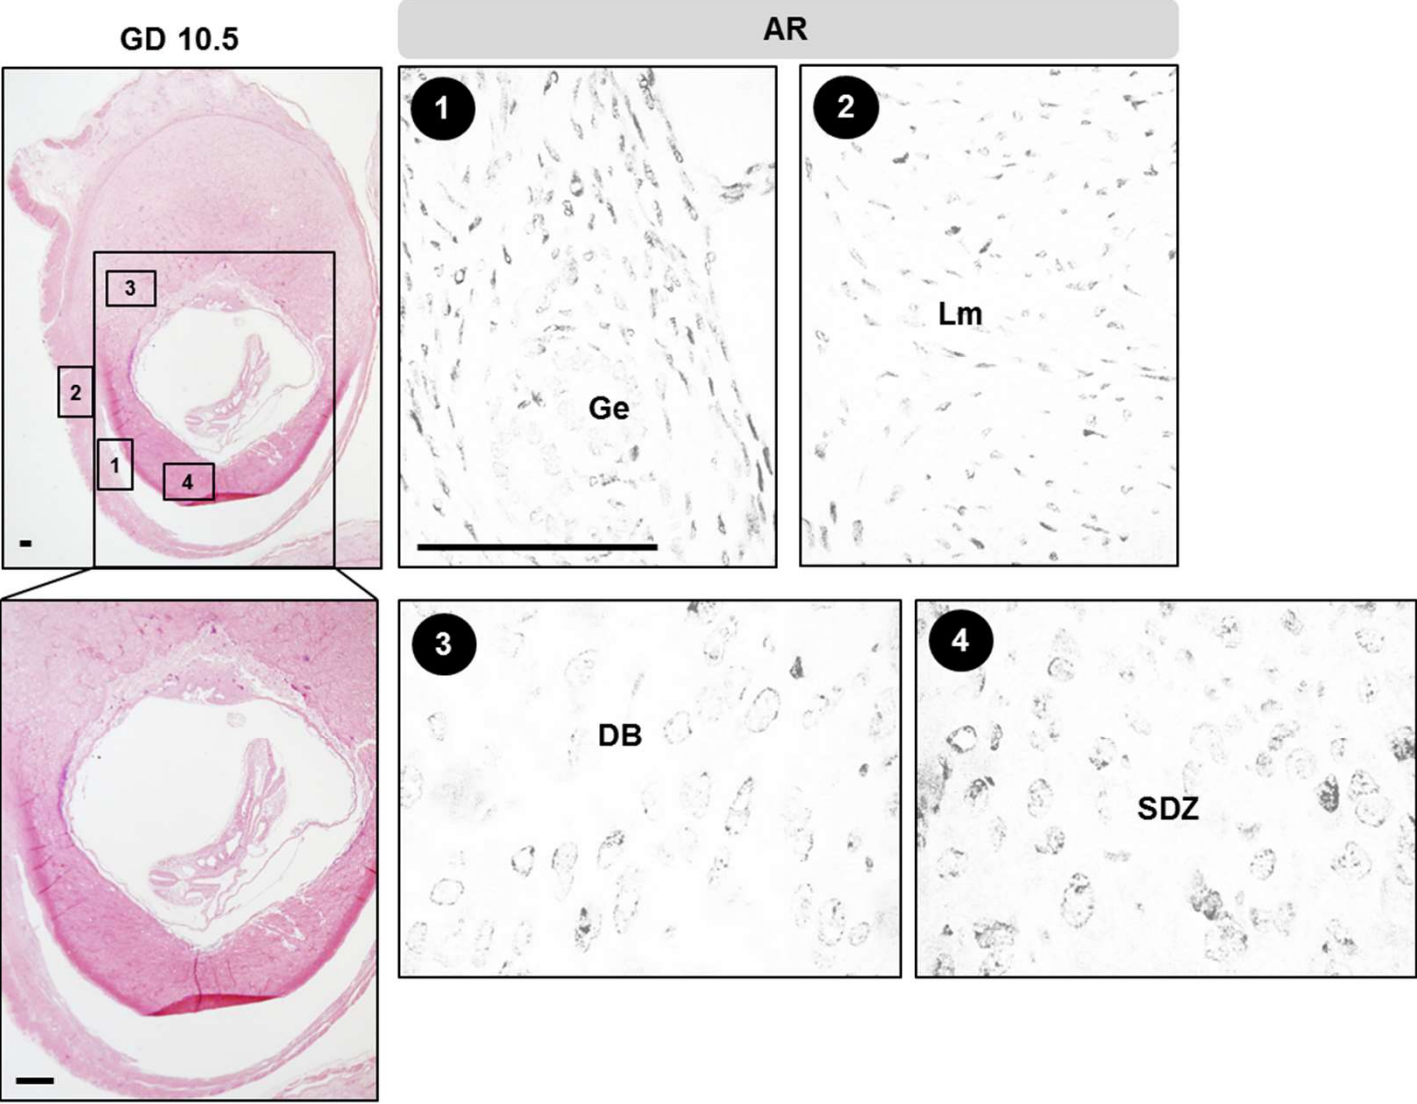

# Suppl Fig. 4

GD 14.5

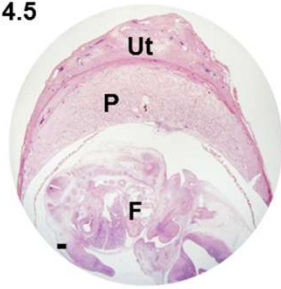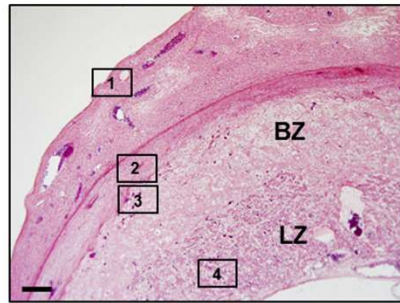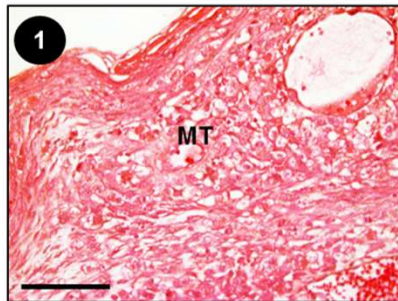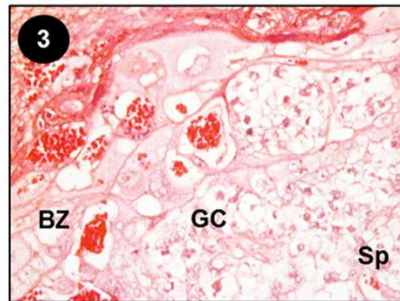

AR      Rabbit IgG

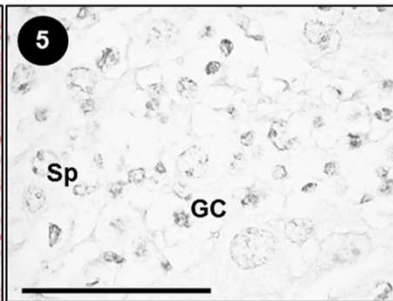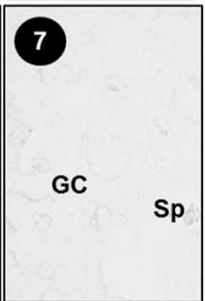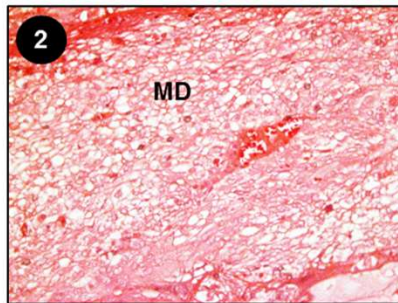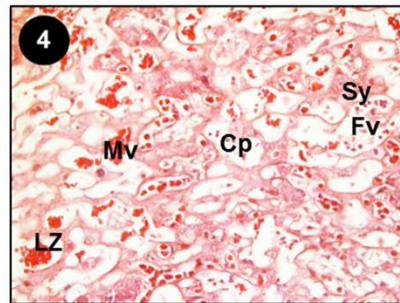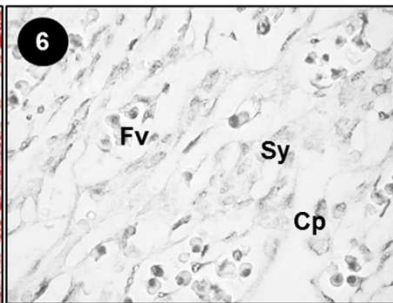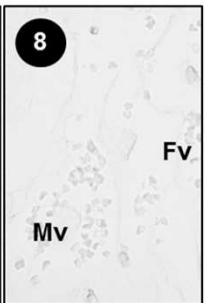



**Suppl Fig. 5**

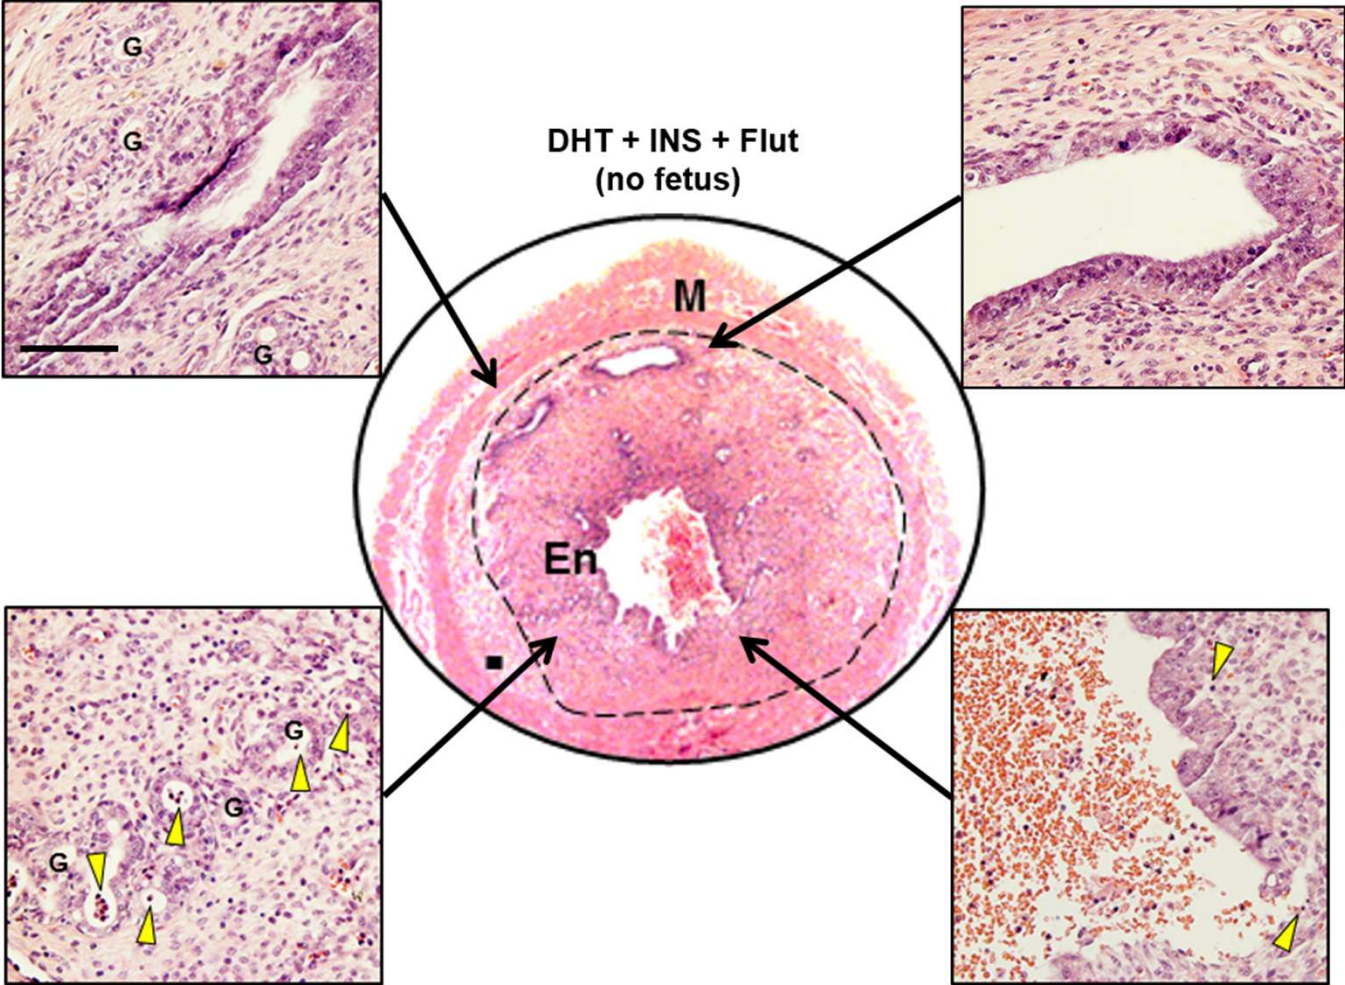

# Suppl Fig. 6

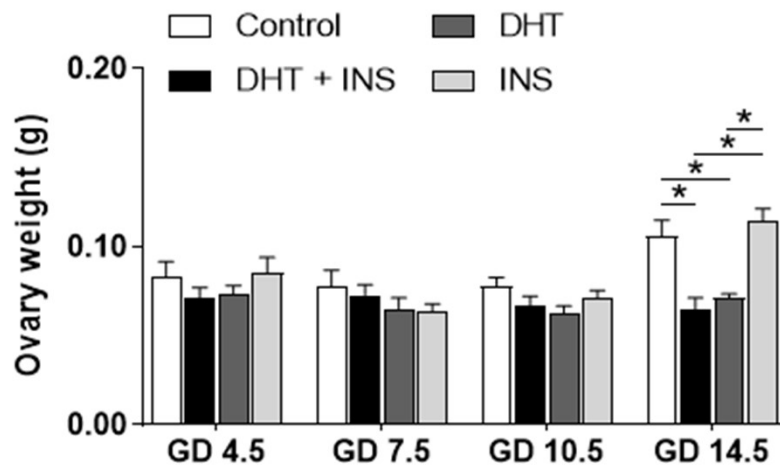

# Suppl Fig. 7

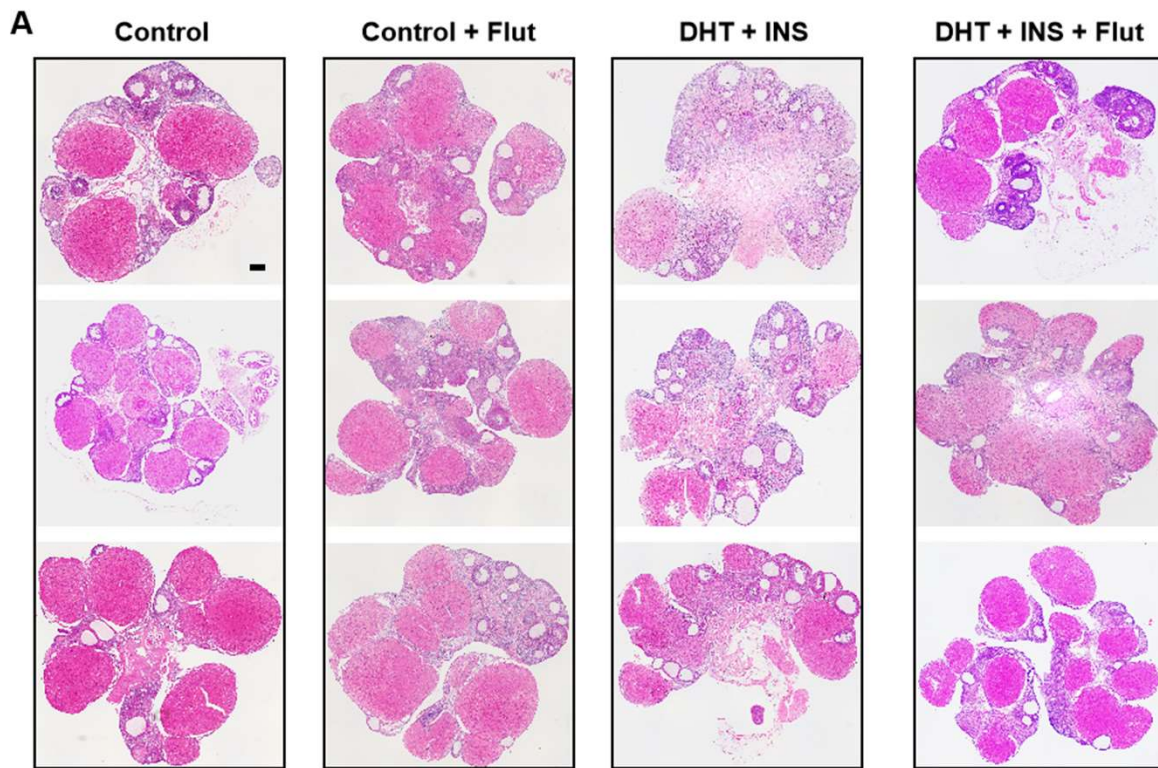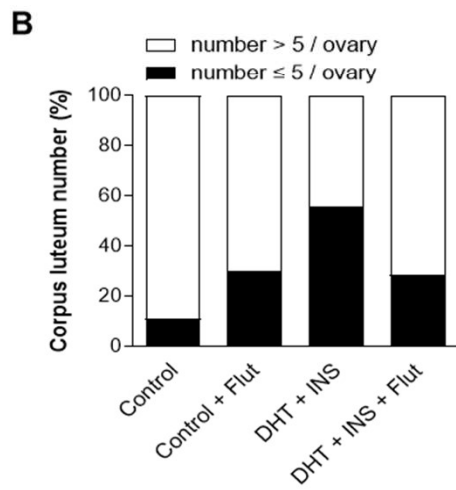

Supplement: 109_2021_2104_MOESM1_ESM.pdf [file 109_2021_2104_MOESM1_ESM.pdf]
